# Supplementary material for: BMPR2 acts as a gatekeeper to protect endothelial cells from increased TGFβ responses and altered cell mechanics
Source: PLoS Biol. 2019 Dec 11;17(12):e3000557. doi: 10.1371/journal.pbio.3000557 (PMC6927666; doi:10.1371/journal.pbio.3000557)
Supplement: S1 Table — (XLSX) [file pbio.3000557.s023.xlsx]

## Sheet: S1 Table
S1 Table. Oligonucleotides used for cloning, genotyping and Quantitative Real Time PCR
Name & Application	Oligonucleotide-sequence (5'-3')
CRISPR-Cas9
hBMPR2-Exon2-sgRNA-For	CACCGGGACAATATTATGCTCGAA
hBMPR2-Exon2-sgRNA-Rev	CAAATTCGAGCATAATATTGTCCC
eLacZ-Exon1-sgRNA-For	CACCGTGCGAATACGCCCACGCGAT
eLacZ-Exon1-sgRNA-Rev	CAAAATCGCGTGGGCGTATTCGCAC
Genotyping Primer gDNA
hBMPR2 Exon2 for	CCTTCTAGGTTTGTTTTGAAGACTTGG
hBMPR2 Exon2 rev	CCACACCTGGCTTTATATATACACT
Genotyping Primer cDNA
hBMPR2 E1 for	GGCTACCATGGACCATCCTG
hBMPR2 E3 rev	GTGCTACAACAGCAGAAACGG
hBMPR2-delE2-c-myc cloning
hBR2 E1 HindIII for	AGACCCAAGCTTATGACTTCCTCGCTGCAGCG
hBR2 E13 myc NotI rev	TTTCGAGCGGCCGCTCACAGGTCCTCCTCTGAGATCAGCTTCTGCTCCAGACAGTTCATTCCTATATC
hBMPR2 delE2 mut for	GCTGGTCAGCACTGCGGCTGGATGTTGGTCTCACATTGGAGATCCCCAAG
hBMPR2 delE2 mut rev	CTTGGGGATCTCCAATGTGAGACCAACATCCAGCCGCAGTGCTGACCAGC
pENTR L1-(CAGA)12‐MLP‐Luc-R5 cloning
CAGA Luc EcoRI rev	GCAGCAGAATTCAGTACTAACATACGCTCTCCATCAAAAC
CAGA Luc BamHI for	GCAGCAGGATCCTGCAATTGTTGTTGTTAACTTGTTTATTG
Real-time PCR Primer
ACVR2A for, rev	CCTGACAGCTTGCATTGCTGACTT, TCTGCGTCGTGATCCCAACATTCT
ACVR2B for, rev	TGAAGCACGAGAACCTGCTACAGT, GGCATACATGTCAATGCGCAGGAA
ALK1 for, rev	ACAACATCCTAGGCTTCATCGC, GGTTTGCCCTGTGTACCG
ALK2 for, rev	AAGCCTGGAGCATTGGTAA, TCACTGGGGTACTCGGAGA
ALK3 for, rev	CATCTTGGAGGAGTCGTAAGAA, TTCTGTCCTTGAACACGAGAAA
ALK4 for, rev	TGCAACAGGATCGACTTGAG, ATGATGCCTACCAGCTCCAC
ALK5 for, rev	ACTGTAAAGTCATCACCTGGC, GTGAATGACAGTGCGGTTGT
ALK6 for, rev	CTGCCATAAGTGAGAAGCAAAC, ACAACGCAAGACCTTTGGAC
BAMBI for, rev	AGAGGGCTGCACGATGTTC, CCGGAACCACAACTCTTTGGA
BMP2 for, rev	CAGCTTCCACCATGAAGAATCT, AATTTCGAGTTGGCTGTTGC
BMP6 for, rev	TCACGGCCACTAGCAATCTG, ACGTGCACCTCACTCACTTT
BMPER for, rev	TAAGCAGTGCATTCCCATCA, GTCCGACCGTCAAAAGTGTT
BMPR2 E2 for, rev	GCAAGACCTTGGGATAGGTGA, CAGGTGCTACCTTTCGAGCA
BMPR2 3UTR for, rev	CATGGAGATGCGTAGCTGTC, GGTTCTGAGGAAGTGCGAGT
COL1A1 for, rev	TGCCGTGACCTCAAGATGTG, GTACACGCAGGTCTCACCAG
COL4A1 for, rev	CTGCGCAAGTTCAGCACAAT, CACGGTGGGATCTGAATGGT
CTGF for, rev	CTCCACCCGGGTTACCAATG, GTGCAGCCAGAAAGCTCAAA
CYR61 for, rev	CACCGCTCTGAAGGGGATCT, TGATGTTTACAGTTGGGCTGG
FBN1 for, rev	GGAACCTGATGAGGCCTTCC, CGGGTTCTTTGCATTCGTCC
FBN2 for, rev	GCCAGATGGGAGATCGTGTG, GAATGTTGGTACACTGGCCG
FN1 for, rev	CTGGCCAGTCCTACAACCAG, CGGGAATCTTCTCTGTCAGCC
GREM1 for, rev	GCACTGACAGTATGAGCCGC, TGAGTCTGCTCTGAGTCATTGT
ID1 for, rev	GCTGCTCTACGACATGAACG, CCAACTGAAGGTCCCTGATG
ID2 for, rev	GTGGCTGAATAAGCGGTGTT, TGTCCTCCTTGTGAAATGGTT
ID3 for, rev	CTTCCGGCAGGAGAGGTT, AAAGGAGCTTTTGCCACTGA
ILK for, rev	CAATGTAATGAACCGTGGGGAT, TCCACAGGCATCTCTCCATAC
ITGA1 for, rev	ACGCTGCTGCGTATCATTCA, CACCTCTCCCAACTGGACAC
ITGA5 for, rev	TGGCCTTCGGTTTACAGTCC, GGTGCAGTTGAGTCCCGTAA
ITGAV for, rev	TCAGCAAGGCAATGCTCCAT, GAGGGCAAGATCCCGCTTAG
ITGB1 for, rev	CTGCGAGTGTGGTGTCTGTA, CACAGGATCAGGTTGGACCG
ITGB3 for, rev	ACCAGTAACCTGCGGATTGG, TCCGTGACACACTCTGCTTC
ITGB5 for, rev	ATACCTGGAACAACGGTGGAG, AGATCCTCAGGCTGATCCCA
ITGB6 for, rev	GCAAGCTGCTGTGTGTAAGGAA, CTTGGGTTACAGCGAAGATCAA
LAMA4 for, rev	GTTGCGCTCCTGGCTACTAT, TCACAGCTTATGGTTGGGCA
ENG for, rev	ATGAGGCGGTGGTCAATATC, AGGAAGTGTGGGCTGAGGTA
NOG for, rev	GTGCAAGCCGTCCAAGTC, GCTAGAGGGTGGTGGAACTG
PAI1 for, rev	AGATCGAGGTGAACGAGAGTG, GGGTCAGGGTTCCATCACTTG
PTK2 for, rev	ACCTCAGCTAGTGACGTATGG, CGGAGTCCCAGGACACTGTG
PXN for, rev	CATGGACGACCTCGACGC, CAAGAACACAGGCCGTTTGG
RSP9 for, rev	CTGCTGACGCTTGATGAGAA, CAGCTTCATCTTGCCCTCAT
SLUG for, rev	CACACGGGGGAGAAGCCTTT, ATTGCGTCACTCAGTGTGCT
SMAD1 for, rev	CAACAGAGGAGATGTTCAGGC, AGTGAAACCATCCACCAACAC
SMAD2 for, rev	CGAAGGCAGACGGTAACAAG, GCTTGAGCAACGCACTGA
SMAD4 for, rev	AAGGTCTTTGATTTGCGTCA, GTCCCCAGCCTTTCACAA
SMAD7 for, rev	GCTTTCAGATTCCCAACTTCTT, ATTTTGCTCCGCACCTTCT
TGFB1 for, rev	AAGTGGACATCAACGGGTTC, GTCCTTGCGGAAGTCAATGT
TGFB2 for, rev	GAGTGCCTGAACAACGGATT, TGCAGCAGGGACAGTGTAAG
TGFB3 for, rev	GGAATGAGCAGAGGATCGAG, ATTGGGCTGAAAGGTGTGAC
TGFBR2 for, rev	GTTCAGAAGTCGGATGTGGAA, TCTGGTTGTCACAGGTGGAA
TGFBR3 for, rev	TTAGCCACTGCAGGTCCAGA, CAGACTTGTGGTGGATGTGG
TNC for, rev	TGCTGAATGGAGACACGACC, GTAGAAGTTCTCGCGTCCGT
TWIST for, rev	GCCGGAGACCTAGATGTCATT, CCCACGCCCTGTTTCTTTGA
VCL for, rev	AAGCACAGCGGTGGATTGAT, AGATCTTGCCGATAAGGCCC
VEGFA for, rev	GAGATGAGCTTCCTACAGCAC, TCACCGCCTCGGCTTGTCACAT
VIM for, rev	GTGGACCAGCTAACCAACGA, CCTGGATTTCCTCTTCGTGGA
CHIP Real-time PCR Primer
ID3 2.7k for, rev	AAAGGAGCGGATTCCTCAACA, TTAAGGCTTTTGTCTGCGCT
ITGB1 prom for, rev	CTCAACGCAGTCCCGGC, CGACCGGGACAAAGGAACC
ITGB1 22k for, rev	GCTAGGAGCTCTGTGCGGA, AGAGCACGTGACTCATTGTGATG
