# Supplementary material for: BMPR2 acts as a gatekeeper to protect endothelial cells from increased TGFβ responses and altered cell mechanics
Source: PLoS Biol. 2019 Dec 11;17(12):e3000557. doi: 10.1371/journal.pbio.3000557 (PMC6927666; doi:10.1371/journal.pbio.3000557)
Supplement: S6 Data — (XLSX) [file pbio.3000557.s019.xlsx]

## Sheet: Fig.6D Fluorescence intensity
Figure 6D Fluorescence intensity (AU)
	WT	BR2-delE2	BR2-KO
n1	17021430	39911000	30804840
n2	15586510	38885800	32067180
n3	14683500	38853020	30879120
Mean	1.57638e+07	3.92166e+07	31250380
S.D.	962655	491193	578360
